# Supplementary material for: Rubidium ion Capture with a phosphotungstic acid-functionalized finger-citron-residue-based carbon
Source: Royal Society of Chemistry journal article supplement (doi:10.1039/c8ra10453k), 2019-01-01
Supplement: c8ra10453k1.pdf [file c8ra10453k1.pdf]

*Supporting information for*

## **Rubidium Ion Capture with a Phosphotungstic Acid Functionalized Finger-Citron-Residue-Based Carbon**

Qing Liu<sup>a</sup>, Guihua Zhao<sup>a</sup>, Yifang Dai<sup>b</sup>, Na Ma<sup>c</sup> and Wei Dai<sup>a,\*</sup>

<sup>a</sup> *College of Chemistry and Life Science, Zhejiang Normal University, Zhejiang Province, Jinhua 321004, PR China*

<sup>b</sup> *Class 14 of first Grade, Jinhua No.1 High School, Zhejiang Province, Jinhua 321004, PR China*

<sup>c</sup> *College of Geography and Environmental Sciences, Zhejiang Normal University, Zhejiang Province, Jinhua 321004, PR China*

### **Section 1:**

The Brunauer–Emmett–Teller (BET) surface areas and pore size distributions of the adsorbents were determined by multipoint N<sub>2</sub> adsorption–desorption at liquid N<sub>2</sub> temperature (−196 °C) on a physical adsorption instrument (Micromeritics, ASAP2020). Prior to analysis, all samples were subjected to a vacuum at 200 °C to ensure a clean surface. The specific surface areas were calculated using the standard Brunauer-Emmett-Teller (BET) method, which is the most widely used model for determining the specific surface area. The surface area of the samples was calculated from the nitrogen adsorption isotherms by assuming the area of a nitrogen molecule to be 0.162 nm<sup>2</sup>. The micropore volumes was obtained from the *t*-plot method. The total pore volumes were estimated to be the liquid volumes of N<sub>2</sub> at a relative pressure of 0.99. The pore size distribution and average pore diameter were calculated using the nonlocal density functional theory (NLDFT) model. X-ray powder diffraction patterns

were recorded on a Philips PW 1710 diffractometer with automatic control. The patterns were obtained with monochromatic Cu K $\alpha$  radiation with a scan rate of 2 °C·min<sup>-1</sup>. Fourier transform infrared (IR) spectra were recorded on a Nicolet Nexus 470 spectrometer with KBr wafer. The contact angle of as-prepared adsorbents was measured using a Dataphysics OCA20 contact angle system in ambient air at room temperature. The scanning electron microscopy (SEM) images were determined by an electron microscope (Hitachi S4800).

## **Section 2:**

### **Figure S.I. captions:**

**Fig. S.I.1.** Pore size distributions of PTA@FMC materials.

**Fig. S.I.2.** SEM images of PTA@FMC materials, in which (a), (b) represent the SEM images of FMC and (c), (d) represent the SEM images of PTA@FMC.

**Fig. S.I.3.** Fourier infrared rays of PTA@FMC materials.

**Fig. S.I.4.** XRD patterns of PTA@FMC materials at cornule.

**Fig. S.I.5.** Influence of the number of interfering ions on the adsorption capacity of  $Rb^+$  onto FMC and PTA@FMC.

**Fig. S.I.6.** The reduction rate of the adsorption amount of  $Rb^+$  and the number of interfering ions.

**Fig. S.I.7** Effect of recycle times of FPC-1 on the CR adsorption capacity.

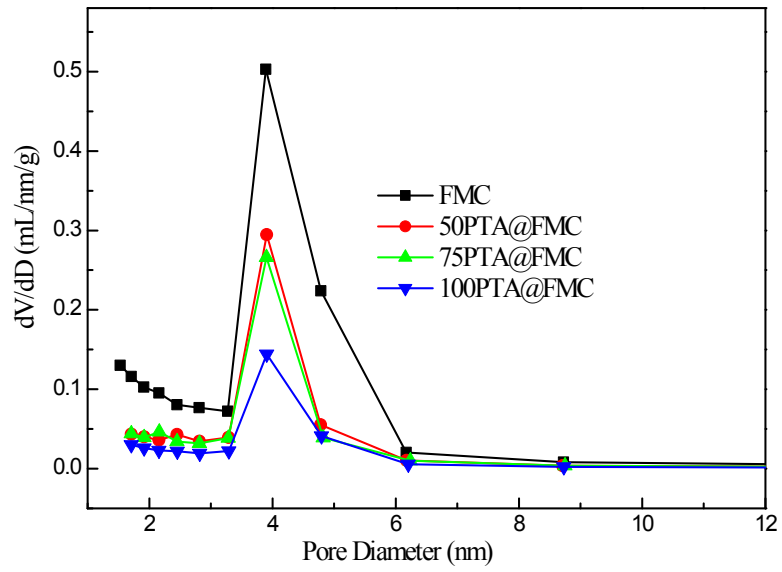

**Fig. S.I.1.** Pore size distributions of PTA@FMC materials.

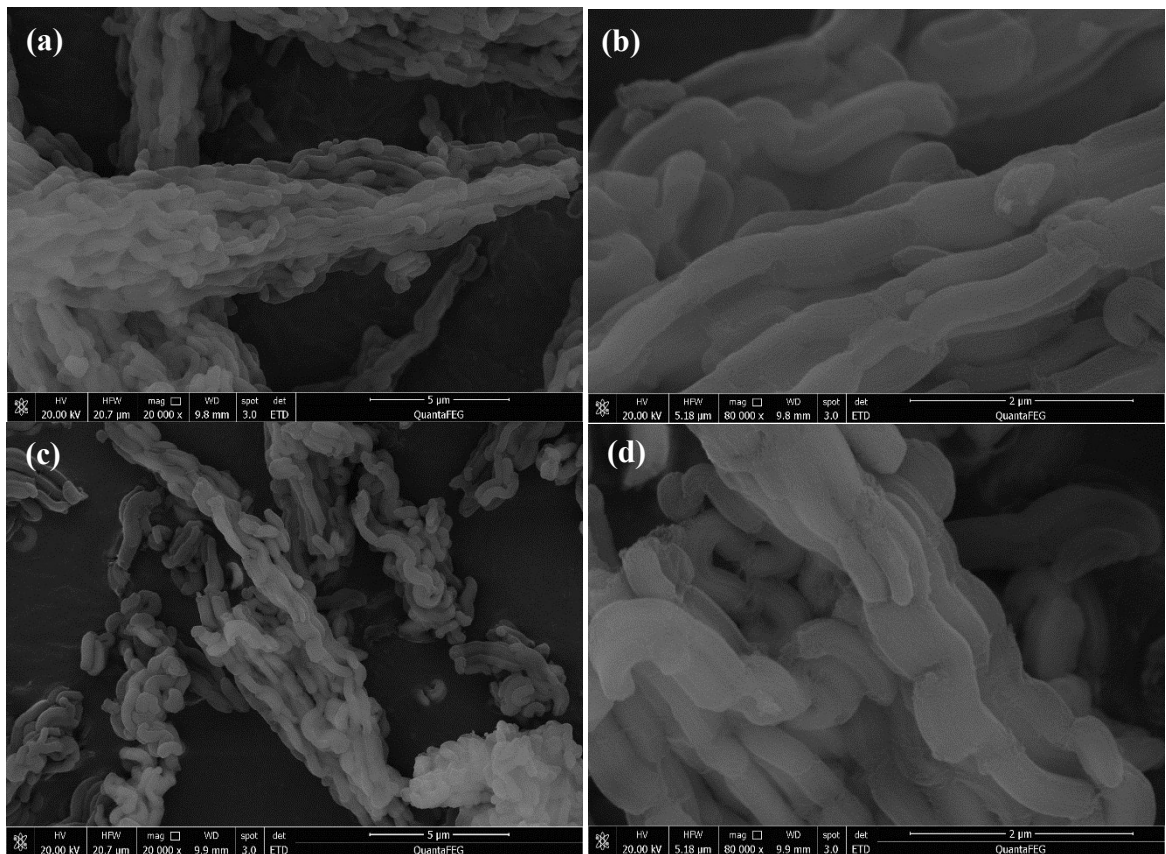

**Fig. S.I.2.** SEM images of PTA@FMC materials, in which (a), (b) represent the SEM images of FMC and (c), (d) represent the SEM images of PTA@FMC.

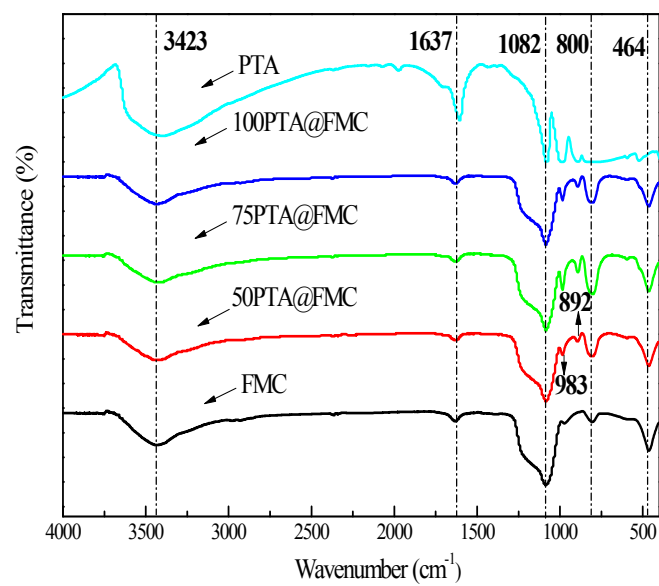

**Fig. S.I.3.** Fourier infrared rays of PTA@FMC materials.

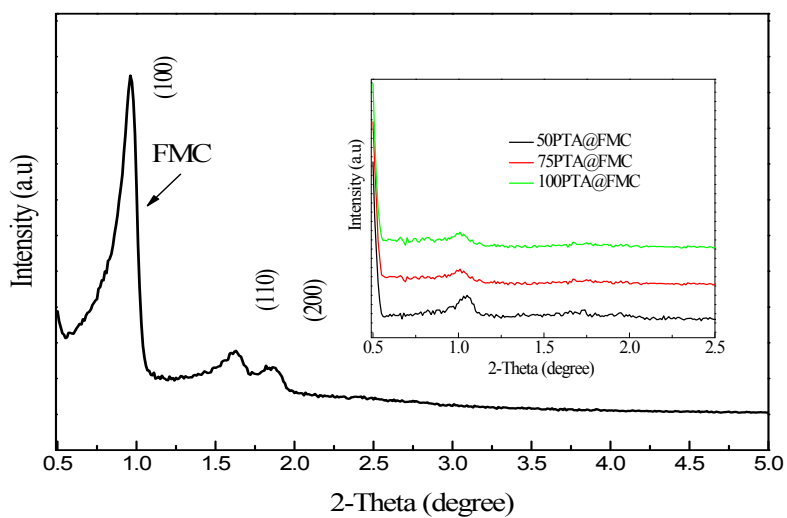

**Fig. S.I.4.** XRD patterns of PTA@FMC materials at cornule.

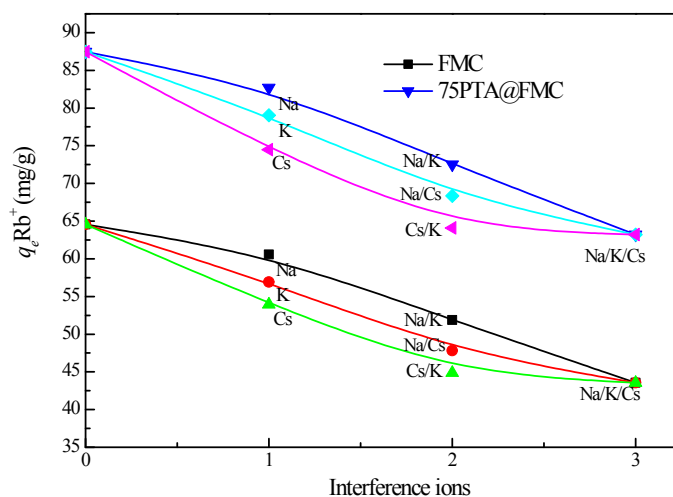

**Fig. S.I.5.** Influence of the number of interfering ions on the adsorption capacity of  $\text{Rb}^+$  onto FMC and PTA@FMC.

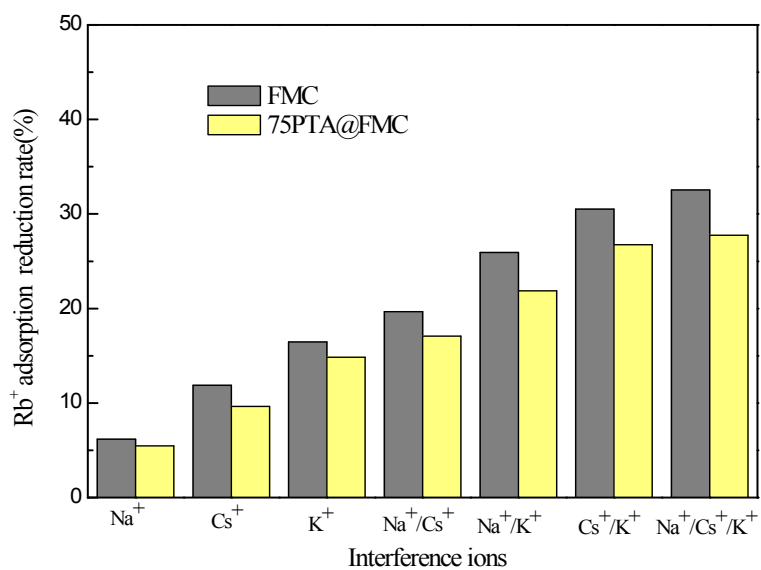

**Fig. S.I.6.** The reduction rate of the adsorption amount of  $\text{Rb}^+$  and the number of interfering ions.

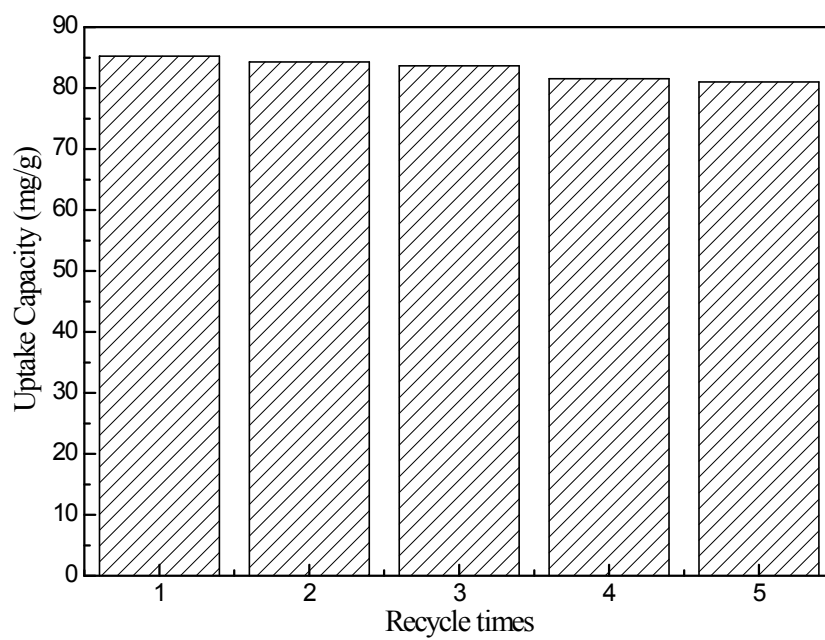

**Fig. S.I.7** Effect of recycle times of FPC-1 on the CR adsorption capacity.

### **Section 3:**

#### **Table S.I. captions:**

**Table S.I.1.** Structural properties of FMC, 50PTA@FMC, 75PTA@FMC and 100PTA@FMC, respectively

**Table S.I.2.** Comparison of the maximum uptake capacities of  $\text{Rb}^+$  on various adsorbents. ( $C_0=100\text{mg/L}$ ,  $\text{pH}=7$ ,  $T=25^\circ\text{C}$ )

**Table S.I.3** Different isotherm models and their linear forms

**Table S.I.4.** Parameters of the isotherm models for the adsorption processes

**Table S.I.5** Calculation equations

**Table S.I.6.** Parameters of the adsorption kinetics for the adsorption processes



**Table S.I.1.** Structural properties of FMC, 50PTA@FMC, 75PTA@FMC and 100PTA@FMC, respectively

| Materials  | $S_{\text{BET}}(\text{m}^2/\text{g})$ | $V(\text{cm}^3/\text{g})$ | Pore width(nm) |
|------------|---------------------------------------|---------------------------|----------------|
| FMC        | 628.54                                | 0.97                      | 6.565          |
| 50PTA@FMC  | 284.32                                | 0.48                      | 6.550          |
| 75PTA@FMC  | 263.36                                | 0.45                      | 6.548          |
| 100PTA@FMC | 176.42                                | 0.25                      | 6.549          |

**Table S.I.2.** Comparison of the maximum uptake capacities of  $\text{Rb}^+$  on various adsorbents. ( $C_0=100\text{mg/L}$ ,  $\text{pH}=7$ ,  $T=25^\circ\text{C}$ )

| Metal ion | Adsorbent        | Maximum uptake capacities<br>(mg/g) | Reference |
|-----------|------------------|-------------------------------------|-----------|
| Rb        | FMC              | 66.65                               | this work |
|           | 75PTA@FMC        | 86.50                               | this work |
|           | MIL-101(Cr)      | 72.88                               | this work |
|           | Co-PBA           | 20                                  | [3]       |
|           | KCoFC(L)         | 70                                  | [23]      |
|           | KCuFC(PAN)       | 7.85                                | [23]      |
|           | Calcium Alginate | 20.64                               | [24]      |
|           | MBI-Imogolite    | 26.11                               | [23]      |
|           | K(Cu)FC          | 86.32                               | [23]      |
| Mordenite | 14.50            | [23]                                |           |

**Table S.I.3** Different isotherm models and their linear forms

| Isotherm   | Nonlinear form                       | Linear form                                                                        | Plot                             | Eqs. |
|------------|--------------------------------------|------------------------------------------------------------------------------------|----------------------------------|------|
| Langmuir-I | $q_e = \frac{K_L C_e}{1 + K_L C_e}$  | $\frac{C_e}{q_e} = \frac{1}{q_L \cdot K_L} + \left(\frac{1}{q_L}\right) \cdot C_e$ | $\frac{C_e}{q_e}$ versus $C_e$   | (1)  |
| Freundlich | $q_e = K_f C_e^{\frac{1}{n}}$        | $\ln q_e = \ln K_f + \left(\frac{1}{n}\right) \cdot \ln C_e$                       | $\ln q_e$ versus $\ln C_e$       | (2)  |
| Temkin     | $q_e = K_t^\beta C_e$                | $\ln q_e = \beta \ln K_t + \ln C_e$                                                | $\ln q_e$ versus $\ln C_e$       | (3)  |
| D-R        | $q_e = q_s e^{(-K_D \varepsilon^2)}$ | $\ln q_e = \ln q_s - K_D \varepsilon^2$                                            | $\ln q_e$ versus $\varepsilon^2$ | (4)  |

Where  $q_e$  is the equilibrium adsorption capacity in mg/g;  $K_L$  is a constant related to the affinity of the binding sites in L/mg; ' $K_f$ ' and ' $n$ ' are measures of adsorption capacity and the intensity of adsorption respectively;  $\beta = (RT)/bT$ , is the Temkin constant; T is the absolute temperature in K; R is the universal gas constant;  $q_s$  is the D-R isotherm constant in mg/g; and  $\varepsilon$  represents the Polanyi potential constant in kJ mol<sup>-1</sup>;

**Table S.I.4.** Parameters of the isotherm models for the adsorption processes

| Samples | $q_m$<br>(mg/g) | Langmuir     |        | Freundlich  |       |        | Temkin            |                |        | D-R             |                                               |        |
|---------|-----------------|--------------|--------|-------------|-------|--------|-------------------|----------------|--------|-----------------|-----------------------------------------------|--------|
|         |                 | $K_L$ (L/mg) | $R^2$  | $K_f$ (L/g) | $n$   | $R^2$  | $b_T$<br>(kJ/mol) | $K_T$<br>(L/g) | $R^2$  | $q_s$<br>(mg/g) | $K_D$<br>(mol <sup>2</sup> /kJ <sup>2</sup> ) | $R^2$  |
| 0       | 67.57           | 3.177E-05    | 0.1424 | 0.9350      | 0.996 | 0.9977 | 86.38             | 0.1241         | 0.8853 | 41.46           | 2.253E-05                                     | 0.7002 |
| 50      | 79.76           | 8.347E-06    | 0.1250 | 1.2414      | 1.003 | 0.9960 | 72.79             | 0.1362         | 0.8843 | 51.17           | 1.95E-05                                      | 0.7204 |
| 75      | 87.48           | 7.824E-04    | 0.8657 | 2.6871      | 1.184 | 0.9925 | 73.49             | 0.1868         | 0.9228 | 58.62           | 1.308E-05                                     | 0.7521 |
| 100     | 76.79           | 5.401E-04    | 0.0418 | 1.2241      | 1.016 | 0.9969 | 76.69             | 0.1354         | 0.8872 | 49.30           | 2.030E-05                                     | 0.7313 |

**Table S.I.5** Calculation equations

| Name                           | equations                                           | Eqs. |
|--------------------------------|-----------------------------------------------------|------|
| Pseudo-first order model       | $\ln(q_e - q_t) = \ln(q_e) - K_1 t$                 | (4)  |
| Pseudo-second order model      | $\frac{t}{q_t} = \frac{1}{K_2 q_e} + \frac{t}{q_e}$ | (5)  |
| Intra-particle diffusion model | $q_t = K_3 t^{1/2}$                                 | (6)  |

Where  $q_e$  and  $q_t$  (mg/g) are the uptakes of thiophene at equilibrium and at time  $t$  (min), respectively,  $K_1$  (1/min) is the adsorption rate constant,  $K_2$  (g/mg.min) is the rate constant for the second-order equation, and  $K_3$  (mg/g.min<sup>1/2</sup>) is the intra-particle diffusion rate constant.

**Table S.I.6.** Parameters of the adsorption kinetics for the adsorption processes

| Sample | Pseudo-first-order rate equation |                       |                       |               |        |                   |                | Pseudo-second-order rate equation |                    |        |                   |                | Intra-particle diffusion model |                                        |        |
|--------|----------------------------------|-----------------------|-----------------------|---------------|--------|-------------------|----------------|-----------------------------------|--------------------|--------|-------------------|----------------|--------------------------------|----------------------------------------|--------|
|        | Ion                              | $q_{e,exp}$<br>(mg/g) | $q_{e,cal}$<br>(mg/g) | $K_1$ (1/min) | $R^2$  | $\Delta q$ (mg/g) | $\Delta q$ (%) | $q_{e,cal}$<br>(mg/g)             | $K_2$<br>(g/mgmin) | $R^2$  | $\Delta q$ (mg/g) | $\Delta q$ (%) | $C$<br>(mg/g)                  | $K_3$<br>(mg/g<br>min <sup>1/2</sup> ) | $R^2$  |
| FMC    | Rb <sup>+</sup>                  | 67.57                 | 3.0882                | -0.0048       | 0.2454 | 64.48             | 95.30          | 67.57                             | 0.1506             | 0.9995 | 0.81              | 1.05           | 62.54                          | 0.7060                                 | 0.0569 |
| 50     |                                  | 79.76                 | 4.7715                | -0.02404      | 0.0093 | 74.99             | 94.18          | 79.76                             | 0.0467             | 0.9996 | 1.51              | 1.97           | 66.93                          | 1.8565                                 | 0.3012 |
| 75     |                                  | 87.48                 | 6.7831                | -0.03638      | 0.1632 | 80.70             | 92.46          | 87.48                             | 0.0230             | 0.9997 | 0.52              | 0.98           | 71.88                          | 2.3079                                 | 0.4555 |
| 100    |                                  | 76.79                 | 4.1167                | -0.06731      | 0.4220 | 72.67             | 94.39          | 76.79                             | 0.0323             | 0.9999 | 0.43              | 0.56           | 67.48                          | 1.4570                                 | 0.5507 |
